# Supplementary material for: AQP2 Promotes Astrocyte Activation by Modulating the TLR4/NFκB-p65 Pathway Following Intracerebral Hemorrhage
Source: PubMed Central journal article supplement (PMC8978957; doi:10.3389/fimmu.2022.847360), 2022-03-21

|   | 1 | 2                | 3                | 4                | 5                | 6                    | 7                             | 8                    | 9                             | 10                            | 11                    | 12      |             |
|---|---|------------------|------------------|------------------|------------------|----------------------|-------------------------------|----------------------|-------------------------------|-------------------------------|-----------------------|---------|-------------|
| A |   |                  |                  |                  |                  |                      |                               |                      |                               |                               |                       |         |             |
| B |   | 3.301            | 3.5562           | 3.6184           | 3.3706           | 3.4126               | 3.4313                        | 3.5282               | 3.3706                        | 3.4536                        | 2.2581                |         |             |
| C |   | 3.3856           | 3.3856           | 3.1139           | 3.4686           | 3.1241               | 3.3002                        | 3.2849               | 3.6012                        | 3.6334                        | 2.948                 |         |             |
| D |   | 3.6309           | 3.0205           | 3.5987           | 3.4438           | 3.2976               | 3.466                         | 3.3646               | 3.466                         | 3.5144                        | 2.6879                |         |             |
| E |   | 3.5336           | 3.2326           | 3.2192           | 3.376            | 3.2753               | 3.4824                        | 3.4367               | 3.0943                        | 2.9384                        | 1.9669                |         |             |
| F |   | 3.415            | 3.2459           | 3.3948           | 3.357            | 3.3755               | 3.3059                        | 3.5331               | 3.357                         | 3.2321                        | 2.2321                |         |             |
| G |   | 3.1603           | 3.26             | 3.3711           | 3.3896           | 3.0353               | 3.26                          | 3.4291               | 3.1385                        | 2.9384                        | 2.747                 |         |             |
| H |   |                  |                  | 0.3322           | 0.3103           | 0.3024               |                               |                      |                               |                               |                       |         |             |
|   |   | blank            | 25               | 50               | 75               | siRNA-NC             | siAQP2-1                      | siAQP2-2             | siAQP2-3                      | empty vector                  | pcDNA3.1-AQP2 plasmid | vehicle | TKA-242     |
|   |   | 3.3856           | 3.415            | 3.3856           | 3.2326           | 3.6184               | 3.2192                        | 3.3706               | 3.376                         | 3.4126                        | 3.2753                | 3.4313  | 3.4824      |
|   |   | 3.301            | 3.5336           | 3.5562           | 3.2459           | 3.1139               | 3.3948                        | 3.4686               | 3.357                         | 3.1241                        | 3.3755                | 3.3002  | 3.3059      |
|   |   | 3.6309           | 3.1603           | 3.0205           | 3.26             | 3.5987               | 3.3711                        | 3.4438               | 3.3896                        | 3.2976                        | 3.0353                | 3.466   | 3.26        |
|   |   | 75hemin+siRNA-NC | 75hemin+siAQP2-1 | 50hemin+siRNA-NC | 50hemin+siAQP2-1 | 75hemin+empty vector | 75hemin+pcDNA3.1-AQP2 plasmid | 50hemin+empty vector | 50hemin+pcDNA3.1-AQP2 plasmid |                               |                       |         |             |
|   |   | 3.4536           | 2.9384           | 3.3706           | 3.0943           | 2.2581               | 1.9669                        | 3.5282               | 3.4367                        |                               |                       |         |             |
|   |   | 3.6334           | 3.2321           | 3.6012           | 3.357            | 2.948                | 2.2321                        | 3.2849               | 3.5331                        |                               |                       |         |             |
|   |   | 3.5144           | 2.9384           | 3.466            | 3.1385           | 2.6879               | 2.747                         | 3.3646               | 3.4291                        |                               |                       |         |             |
|   |   | blank            | 25               |                  |                  | siRNA-NC             |                               |                      |                               | empty vector                  |                       | vehicle |             |
|   |   | 3.3856           | 3.415            | 99.30212271      |                  | 3.6184               | 105.2115542                   |                      |                               | 3.4126                        | 99.22754528           | 3.4313  | 99.77128176 |
|   |   | 3.301            | 3.5336           | 102.7507997      |                  | 3.1139               | 90.54230008                   |                      |                               | 3.1241                        | 90.83888361           | 3.3002  | 95.95931107 |
|   |   | 3.6309           | 3.1603           | 91.89589997      |                  | 3.5987               | 104.6387409                   |                      |                               | 3.2976                        | 95.88371134           | 3.466   | 100.7802473 |
|   |   | 3.439166667      | 50               |                  |                  | siAQP2-1             |                               |                      |                               | pcDNA3.1-AQP2 plasmid         |                       | TKA-242 |             |
|   |   |                  | 3.3856           | 98.44722303      |                  | 3.2192               | 93.6040889                    |                      |                               | 3.2753                        | 95.23529833           | 3.4824  | 101.2571071 |
|   |   |                  | 3.5562           | 103.4079674      |                  | 3.3948               | 98.70997794                   |                      |                               | 3.3755                        | 98.14879538           | 3.3059  | 96.12504892 |
|   |   |                  | 3.0205           | 87.83076476      |                  | 3.3711               | 98.02085738                   |                      |                               | 3.0353                        | 88.25686227           | 3.26    | 94.79042303 |
|   |   |                  | 75               |                  |                  | siAQP2-2             |                               |                      |                               | 50hemin+empty vector          |                       |         |             |
|   |   |                  | 3.2326           | 93.99825531      |                  | 3.3706               | 98.00631897                   |                      |                               | 3.5282                        | 102.5888253           |         |             |
|   |   |                  | 3.2459           | 94.38499564      |                  | 3.4686               | 100.855847                    |                      |                               | 3.2849                        | 95.51443577           |         |             |
|   |   |                  | 3.26             | 94.79499855      |                  | 3.4438               | 100.134742                    |                      |                               | 3.3646                        | 97.83185807           |         |             |
|   |   |                  |                  |                  |                  | siAQP2-3             |                               |                      |                               | 50hemin+pcDNA3.1-AQP2 plasmid |                       |         |             |
|   |   |                  |                  |                  |                  | 3.376                | 98.16333378                   |                      |                               | 3.4367                        | 99.92829657           |         |             |
|   |   |                  |                  |                  |                  | 3.357                | 97.61087426                   |                      |                               | 3.5331                        | 102.7313017           |         |             |
|   |   |                  |                  |                  |                  | 3.3896               | 98.55877849                   |                      |                               | 3.4291                        | 99.70731276           |         |             |
|   |   |                  |                  |                  |                  | 50hemin+siRNA-NC     |                               |                      |                               | 75hemin+empty vector          |                       |         |             |
|   |   |                  |                  |                  |                  | 3.3706               | 98.00631897                   |                      |                               | 2.2581                        | 65.6583602            |         |             |
|   |   |                  |                  |                  |                  | 3.6012               | 104.7114329                   |                      |                               | 2.948                         | 85.71845616           |         |             |
|   |   |                  |                  |                  |                  | 3.466                | 100.7802473                   |                      |                               | 2.6879                        | 78.15557609           |         |             |
|   |   |                  |                  |                  |                  | 50hemin+siAQP2-1     |                               |                      |                               | 75hemin+pcDNA3.1-AQP2 plasmid |                       |         |             |
|   |   |                  |                  |                  |                  | 3.0943               | 89.97239447                   |                      |                               | 1.9669                        | 57.19119112           |         |             |
|   |   |                  |                  |                  |                  | 3.357                | 97.61087426                   |                      |                               | 2.2321                        | 64.90236296           |         |             |
|   |   |                  |                  |                  |                  | 3.1385               | 91.25758978                   |                      |                               | 2.747                         | 79.87401597           |         |             |
|   |   |                  |                  |                  |                  | 75hemin+siRNA-NC     |                               |                      |                               |                               |                       |         |             |
|   |   |                  |                  |                  |                  | 3.4536               | 100.4196948                   |                      |                               |                               |                       |         |             |
|   |   |                  |                  |                  |                  | 3.6334               | 105.6477064                   |                      |                               |                               |                       |         |             |
|   |   |                  |                  |                  |                  | 3.5144               | 102.1875652                   |                      |                               |                               |                       |         |             |
|   |   |                  |                  |                  |                  | 75hemin+siAQP2-1     |                               |                      |                               |                               |                       |         |             |
|   |   |                  |                  |                  |                  | 2.9384               | 85.43931872                   |                      |                               |                               |                       |         |             |
|   |   |                  |                  |                  |                  | 3.2321               | 93.97917984                   |                      |                               |                               |                       |         |             |
|   |   |                  |                  |                  |                  | 2.9384               | 85.43931872                   |                      |                               |                               |                       |         |             |

  

**A**

| Concentration | Cell Growth Rate (%) |
|---------------|----------------------|
| blank         | 100                  |
| 25            | ~100                 |
| 50            | ~100                 |
| 75            | ~100                 |

**B**

| Treatment | Cell Growth Rate (%) |
|-----------|----------------------|
| blank     | 100                  |
| siRNA-NC  | ~100                 |
| siAQP2-1  | ~100                 |
| siAQP2-2  | ~100                 |
| siAQP2-3  | ~100                 |

  

**C**

| Treatment             | Cell Growth Rate (%) |
|-----------------------|----------------------|
| blank                 | 100                  |
| empty vector          | ~100                 |
| pcDNA3.1-AQP2 plasmid | ~100                 |

**D**

| Treatment | Cell Growth Rate (%) |
|-----------|----------------------|
| blank     | 100                  |
| vehicle   | ~100                 |
| TKA-242   | ~100                 |

  

**E**

| Treatment                     | Cell Growth Rate (%) |
|-------------------------------|----------------------|
| blank                         | 100                  |
| 50hemin+siRNA-NC              | ~100                 |
| 50hemin+siAQP2-1              | ~100                 |
| 75hemin+siRNA-NC              | ~100                 |
| 75hemin+siAQP2-1              | ~100                 |
| 50hemin+empty vector          | ~100                 |
| 50hemin+pcDNA3.1-AQP2 plasmid | ~100                 |
| 75hemin+empty vector          | ~100                 |
| 75hemin+pcDNA3.1-AQP2 plasmid | ~100                 |

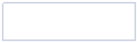



Supplement: Table_1.pdf [file Table_1.pdf]
